# Supplementary material for: The Capacity to Vote of Persons With Serious Mental Illness
Source: Atypon-hosted journal article supplement (doi:10.1176/ps.2009.60.5.624), 2009-05-01
Supplement: pss_60_05_624_01.pdf [file pss_60_05_624_01.pdf]

## **Voting Simulation**

---

*[Hand participant the card below with the following instructions]*

“I am handing you a sample voting ballot. To complete this ballot a person must place an X in the box next to the name of the candidate of his/her choice. Please show me what you would do to vote for [*candidate name; either Katherine Moore or Richard Harris*].”

| <b>Governor of New York State</b>                                           |                          |
|-----------------------------------------------------------------------------|--------------------------|
| To vote, please place an X in the box next to the candidate of your choice. |                          |
| <b>Katherine Moore</b><br>Republican Candidate                              | <input type="checkbox"/> |
| <b>Richard Harris</b><br>Democratic Candidate                               | <input type="checkbox"/> |

*[Score of 2: Places an “X” in the box next to the name of the correct candidate. Score of 1: Identifies correct candidate, but places a mark outside the box or an incorrect mark in the box. Score of 0: Fails to identify and mark the correct candidate.]*
